# Supplementary material
Source: MDPI journal article supplement (https://www.mdpi.com/2071-1050/14/1/344)
Supplement: s1 [file s1]

Archive with 2 entries (2 files):
- sustainability-1451309-supplementary Table S1.pdf
- sustainability-1451309-supplementary Table S2.pdf
